# Supplementary material for: A Triboelectric Nanogenerator Based on Bamboo Leaf for Biomechanical Energy Harvesting and Self-Powered Touch Sensing
Source: MDPI journal article supplement (doi:10.3390/electronics13040766), 2024-02-15
Supplement: s1 [file s1]

# A Triboelectric Nanogenerator Based on Bamboo Leaf for Biomechanical Energy Harvesting and Self-powered Touch Sensing

Zhantang Xu<sup>1</sup>, Yasheng Chang<sup>2\*</sup>, Zhiyuan Zhu<sup>3</sup>

<sup>1</sup>State Key Laboratory of Tropical Oceanography, South China Sea Institute of Oceanology, Chinese Academy of Sciences, Guangzhou 510300, China;

<sup>2</sup>School of Optical and Electronic Information and the Suzhou Key Laboratory of Biophotonics, Suzhou City University, Suzhou, 215104, China;

<sup>3</sup>Chongqing Key Laboratory of Nonlinear Circuits and Intelligent Information Processing, College of Electronic and Information Engineering, Southwest University, Chongqing 400715, China.

\*Correspondence: Yasheng Chang, cocys@126.com.

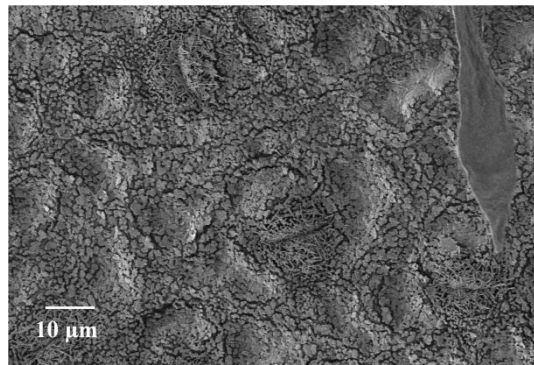

Figure S1. The SEM image of bamboo leaf surface.

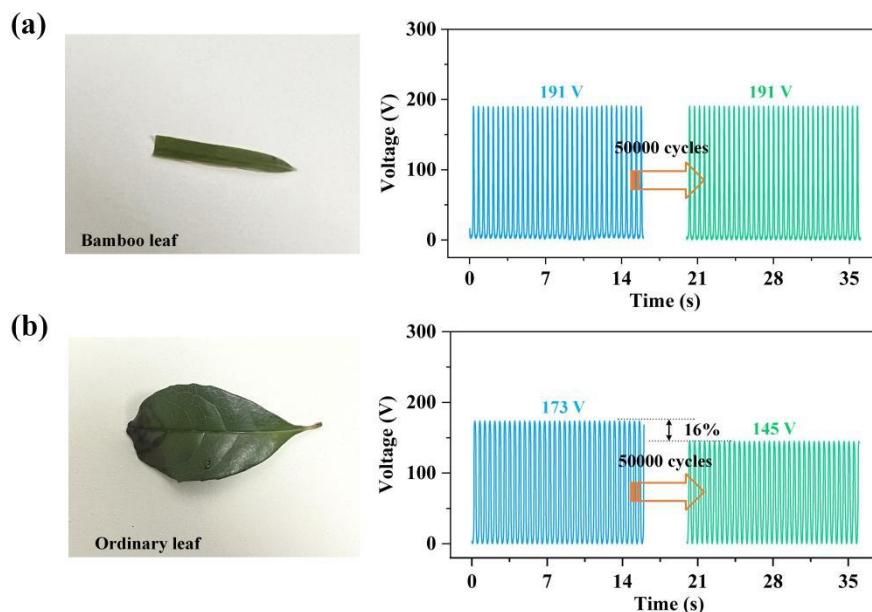

Figure S2. (a, b). The reliability comparison of two TENGs based on bamboo leaf and ordinary leaf.

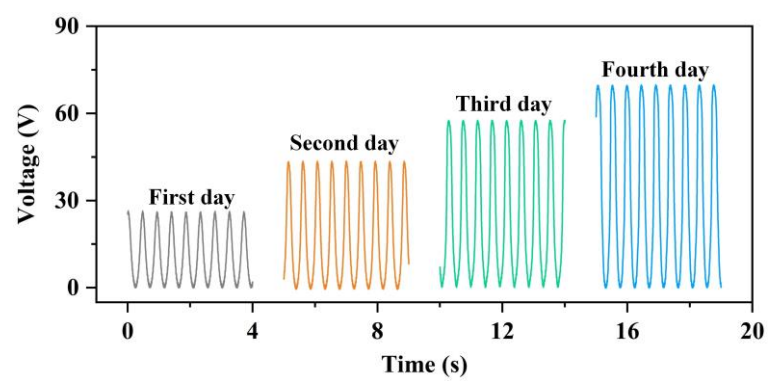

Figure S3. The long-term stability of BL-TENGs in terms of days.
